# Supplementary material for: Development of a cationic polyethyleneimine-poly(lactic-co-glycolic acid) nanoparticle system for enhanced intracellular delivery of biologics
Source: Royal Society of Chemistry journal article supplement (doi:10.1039/d3ra06050k), 2023-01-01
Supplement: d3ra06050k1.pdf [file d3ra06050k1.pdf]

### Supplementary Information

#### Nanoparticle Synthesis

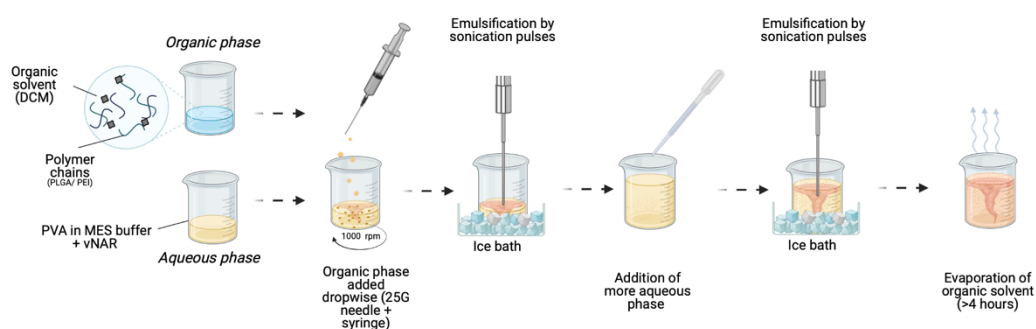

#### Nanoparticle Washing

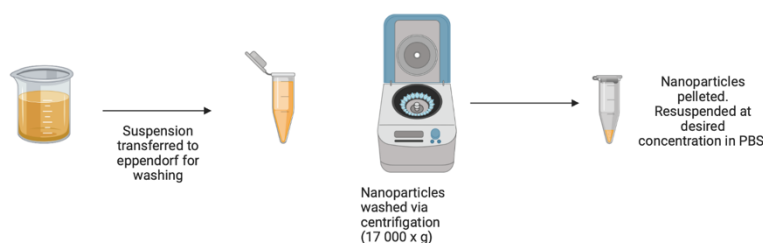

#### PLGA/PEI Polymer Structures

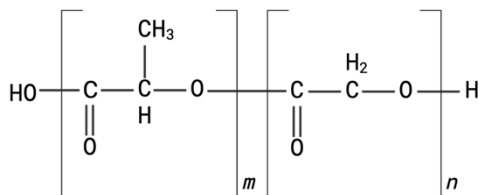

**PLGA**

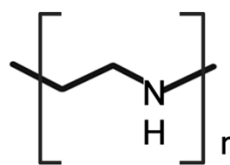

**PEI**

Supplemental 1 -Schematic depicting synthesis of PLGA-PEI Nanoparticles and PLGA/PEI polymer structures

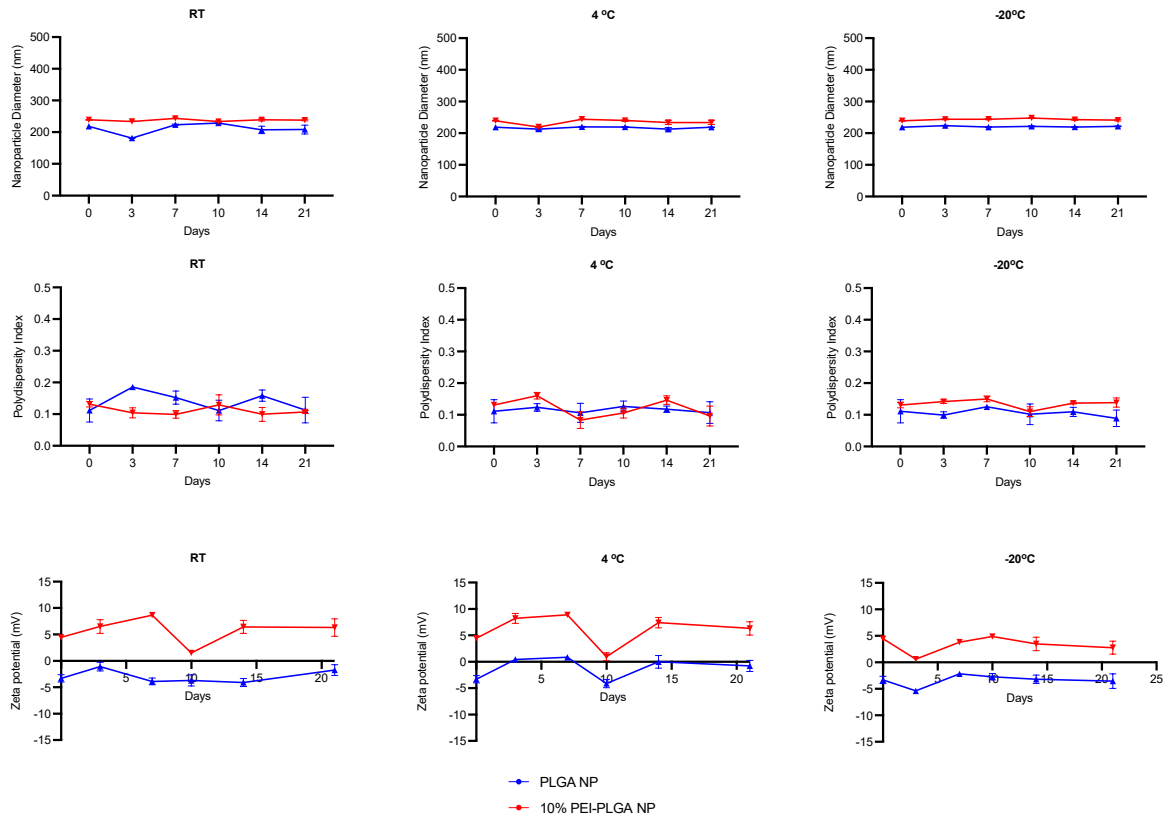

**Supplemental 2: Assessment of nanoparticle stability**

Nanoparticle diameter, polydispersity index zeta potential was measured for both PLGA and 10% PEI-PLGA Nanoparticles over a period of 21 days at various temperatures (RT, 4°C, -20°C) to assess NP stability.

A

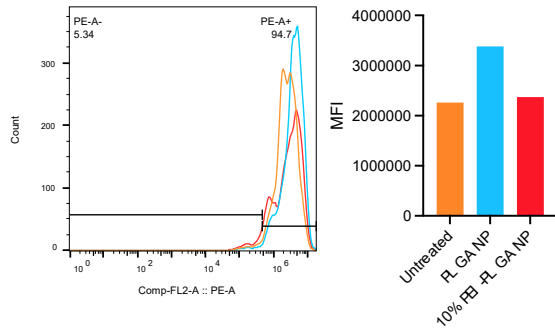

| Sample Name                 | MFI     |
|-----------------------------|---------|
| Untreated                   | 2260000 |
| PLGA NP – 0.1 mg/mL         | 3380000 |
| 10% PEI-PLGA NP – 0.1 mg/mL | 2370000 |

B

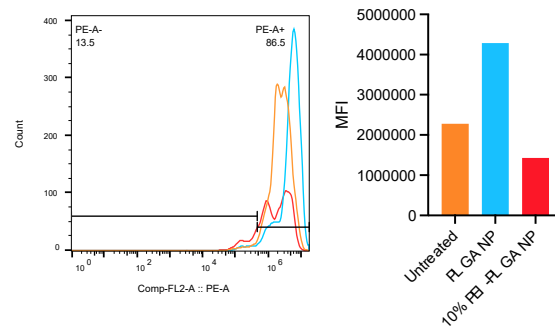

| Sample Name                 | MFI     |
|-----------------------------|---------|
| Untreated                   | 2260000 |
| PLGA NP – 0.5 mg/mL         | 4290000 |
| 10% PEI-PLGA NP – 0.5 mg/mL | 1430000 |

C

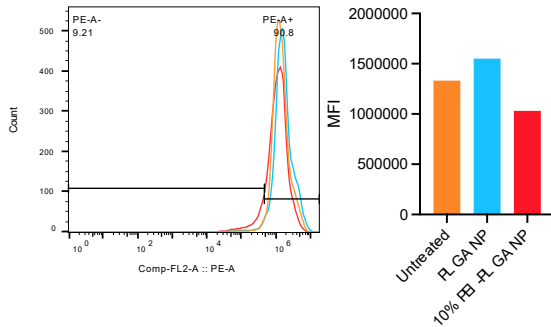

| Sample Name                 | MFI     |
|-----------------------------|---------|
| Untreated                   | 1330000 |
| PLGA NP – 0.1 mg/mL         | 1550000 |
| 10% PEI-PLGA NP – 0.1 mg/mL | 1030000 |

D

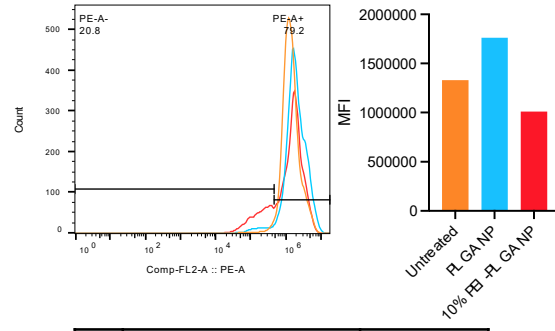

| Sample Name                 | MFI     |
|-----------------------------|---------|
| Untreated                   | 1330000 |
| PLGA NP – 0.5 mg/mL         | 1760000 |
| 10% PEI-PLGA NP – 0.5 mg/mL | 1010000 |

### Supplemental 3 - Cationic NP causes lysosome disruption

The ability of cationic nanoparticles to escape the lysosome was assessed via Acridine Orange staining. HeLa cells were treated with 0.02- 0.5 mg/mL of PLGA or 10%-PEI-PLGA nanoparticles for (A-B) 24 h and (C-D) 48 h. Following treatment cells were stained with acridine orange and cell fluorescence detected via FACS. Representative histograms show population shift relative to the untreated control for a low and high polymer concentrations of 0.1 mg/mL (A & C) and 0.5 mg/mL (B & D), where corresponding graphs show the mean fluorescence intensity (MFI). Data expressed as mean  $\pm$  SEM (n=3). Significance was assessed by one-way ANOVA and Tukey's post-hoc test (\*\*\*\* p<0.0001, \*\*\* p<0.001, \*\* p<0.01, \* p<0.05, ns p>0.05).

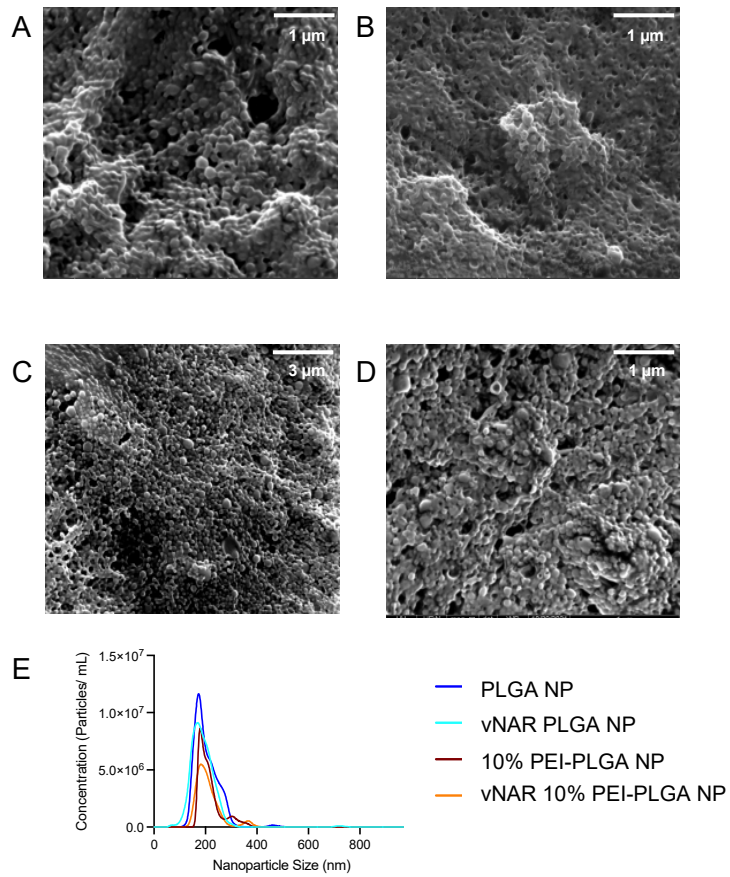

#### Supplemental 4: Nanoparticle Characterisation

Physicochemical properties of PLGA nanoparticles and 10% PEI-PLGA vNAR entrapped nanoparticles were further assessed via Electron Microscope (SEM) ( A-D) and (E) nanoparticle tracking analysis (NTA).

---

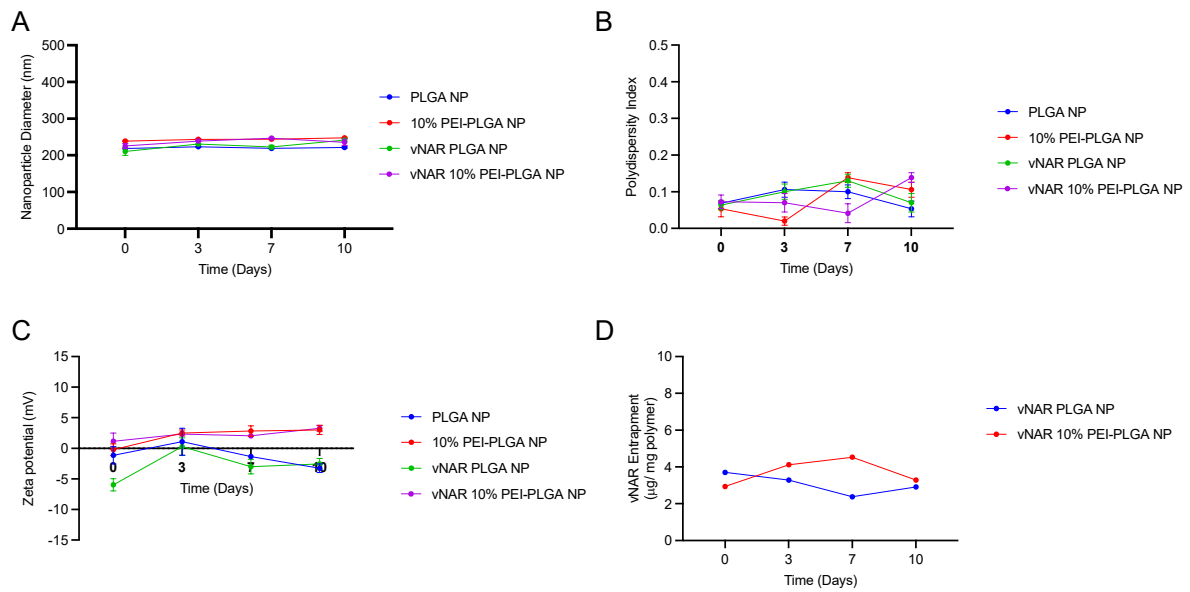

### Supplemental 5: Assessment of cationic nanoparticle stability and vNAR loading

Nanoparticle was assessed in vNAR entrapped nanoparticle for a period of 10 days at 4°C where (A) nanoparticle diameter, (B) PDI, (C) zeta potential and (D) vNAR entrapment was quantified. Data expressed as mean  $\pm$  SEM.

---
